# Supplementary material for: The dorsomedial prefrontal cortex computes task-invariant relative subjective value for self and other
Source: PubMed Central journal article supplement (PMC6565363; doi:10.7554/elife.44939), 2019-06-13
Supplement: elife-44939-fig1-data1.pdf [file elife-44939-fig1-data1.pdf]

**Figure 1–source data 1: Bayes factor approximation for behavioral model fitting**

| Intertemporal, $2k$ versus $1k$ model |              |                                                  | Risk, $1\alpha$ versus $2\alpha$ model |              |                                                   |
|---------------------------------------|--------------|--------------------------------------------------|----------------------------------------|--------------|---------------------------------------------------|
| Participant                           | Bayes Factor | Parameters $2k$ ( $k_{self}, k_{other}, \beta$ ) | Participant                            | Bayes Factor | Parameters $1\alpha$ ( $\alpha_{shared}, \beta$ ) |
| IC1                                   | 2.15e+07     | 0.0066, 6.65e-04, 0.9943                         | RI1                                    | 2.25e+09     | 1.0366, 0.4710                                    |
| IC2                                   | 9.36e+10     | 0.0176, 4.53e-04, 0.6683                         | RI2                                    | 3.27e+06     | 1.7897, 0.0409                                    |
| IC3                                   | 63.67        | 0.0038, 8.68e-04, 0.5742                         | RI3                                    | 2.31e+05     | 1.2556, 0.4671                                    |
| IC4                                   | 1.07e+11     | 0.0092, 3.45e-04, 0.9432                         | RI4                                    | 3.60e+04     | 1.1899, 0.4465                                    |
| IC5                                   | 8.51         | 0.0020, 6.47e-04, 0.6367                         | RI5                                    | 1.42         | 0.9893, 0.8758                                    |
| IC6                                   | 3.81         | 6.75e-04, 6.36e-05, 0.8013                       | RI6                                    | 2.83e+04     | 1.1869, 0.6007                                    |
| IC7                                   | 1.80e+04     | 0.0031, 0.0240, 0.4999                           | RI7                                    | 2.24e+03     | 1.0147, 0.5449                                    |
| IC8                                   | 1.43e+05     | 0.0059, 7.16e-04, 0.7027                         | RI8                                    | 4.33e+40     | 1.0851, 0.2628                                    |
| IC9                                   | 7.02e+12     | 0.0362, 6.55e-04, 0.5535                         | RI9                                    | 3.59e+11     | 1.2120, 0.3684                                    |
| IC10                                  | 3.78e+05     | 0.0019, 1.10e-04, 1.1551                         | RI10                                   | 20.64        | 1.1738, 0.7934                                    |
| IC11                                  | 1.70e+08     | 0.0020, 0.0152, 0.6607                           | RI11                                   | 520.00       | 0.9798, 0.8677                                    |
| IC12                                  | 6.86         | 0.0015, 6.55e-04, 1.0756                         | RI12                                   | 3.35e+10     | 1.9955, 0.0272                                    |
| IC13                                  | 9.21e+04     | 0.0070, 0.0441, 0.6590                           | RI13                                   | 5.90e+04     | 1.0769, 0.4396                                    |
| IC14                                  | 9.67e+14     | 2.47e-05, 0.0466, 0.5846                         | RI14                                   | 2.92e+05     | 1.0290, 0.9631                                    |
| IC15                                  | 1.86e+12     | 6.93e-04, 0.0280, 0.5566                         | RI15                                   | 3.27e+06     | 1.2540, 0.3702                                    |
| IC16                                  | 8.39e+14     | 6.43e-04, 0.0239, 1.1254                         | RI16                                   | 7.37e+09     | 0.9272, 0.3444                                    |
| IC17                                  | 5.24e+17     | 0.0011, 0.0497, 0.6398                           | RI17                                   | 2.48         | 1.1920, 0.4780                                    |
| IC18                                  | 2.06e+06     | 0.0085, 0.0850, 0.5876                           | RI18                                   | 3.27e+10     | 0.9736, 0.1555                                    |
| IC19                                  | 2.11e+06     | 0.0036, 0.244, 0.9836                            | RI19                                   | 4.88e+53     | 1.1686, 0.3869                                    |
| IC20                                  | 5.74e+03     | 0.0140, 0.0736, 1.0033                           | RI20                                   | 6.22e+14     | 1.3210, 0.3633                                    |
|                                       |              |                                                  | RI21                                   | 2.58e+11     | 1.2443, 0.3327                                    |

**Related to Figure 1.** An approximation of the Bayes factor was calculated from BIC values for the  $2k$  model relative to the  $1k$  model for the intertemporal choice task, as well as for the  $1\alpha$  model relative to the  $2\alpha$  model for the risky choice task. Higher values thus indicate a higher probability of the  $2k$  model for intertemporal choice and the  $1\alpha$  model for risky choice. Individual parameters for the best fitting model for each participant are also displayed.
