# Supplementary material for: The dorsomedial prefrontal cortex computes task-invariant relative subjective value for self and other
Source: PubMed Central journal article supplement (PMC6565363; doi:10.7554/elife.44939), 2019-06-13
Supplement: elife-44939-fig2-data1.pdf [file elife-44939-fig2-data1.pdf]

**Figure 2—source data 1: Other over Self trials GLM contrast for the intertemporal choice paradigm and “social” term search on Neurosynth**

| Analysis                                         | Voxels | Max $z$ | Max MNI Coordinates | Area                                          | Side |
|--------------------------------------------------|--------|---------|---------------------|-----------------------------------------------|------|
| Other over Self trials GLM, intertemporal choice | 587    | 4.71    | -52 36 -6           | Frontal pole                                  | L    |
|                                                  | 463    | 4.60    | -62 -26 -14         | Middle temporal gyrus, posterior division     | L    |
|                                                  | 417    | 4.42    | -48 -56 46          | Angular gyrus                                 | L    |
|                                                  | 244    | 4.55    | -8 42 -20           | Frontal medial cortex                         | L    |
|                                                  | 166    | 4.29    | -4 52 36            | Superior frontal gyrus                        | L    |
|                                                  | 92     | 4.23    | 26 -82 -42          | Cerebellum                                    | R    |
| Neurosynth term search for “social”              | 1667   | 9.63    | 2 58 20             | Frontal pole                                  | R    |
|                                                  | 957    | 7.28    | 50 -44 10           | Middle temporal gyrus                         | R    |
|                                                  | 773    | 7.47    | 0 26 -24            | Subcallosal cortex                            | N/A  |
|                                                  | 743    | 7.77    | 54 12 -34           | Temporal pole                                 | R    |
|                                                  | 731    | 7.43    | -36 24 -18          | Frontal orbital cortex                        | L    |
|                                                  | 650    | 8.36    | -58 -60 20          | Middle temporal gyrus, temporoccipital part   | L    |
|                                                  | 566    | 9.26    | -2 -56 36           | Precuneous cortex                             | L    |
|                                                  | 417    | 7.82    | 18 -2 -14           | Right amygdala                                | R    |
|                                                  | 390    | 8.13    | 46 26 -12           | Frontal orbital cortex                        | R    |
|                                                  | 248    | 7.03    | -20 -6 -18          | Left amygdala                                 | L    |
|                                                  | 208    | 6.68    | 46 -42 -22          | Inferior temporal gyrus, temporoccipital part | R    |
|                                                  | 88     | 5.64    | -10 30 58           | Superior frontal gyrus                        | L    |
|                                                  | 52     | 5.73    | 4 10 -4             | Subcallosal cortex                            | R    |

**Related to Figure 2.** Other over Self trials GLM for intertemporal choice thresholded at  $P < 0.05$  FWE-corrected, cluster-defining threshold  $P < 0.001$ . Neurosynth term search thresholded at  $P < 0.01$ , FDR-corrected. Only clusters with greater than 40 voxels listed for Neurosynth term search. Coordinates were reported in accordance with the Montreal Neurological Institute (MNI) Atlas.
