# Supplementary material for: The dorsomedial prefrontal cortex computes task-invariant relative subjective value for self and other
Source: PubMed Central journal article supplement (PMC6565363; doi:10.7554/elife.44939), 2019-06-13
Supplement: elife-44939-fig3-data1.pdf [file elife-44939-fig3-data1.pdf]

**Figure 3—source data 1: Relative subjective value (RSV) GLM for Self and Other trials in the intertemporal and risky choice paradigms**

| Analysis                                               | Voxels                 | Max z    | Max MNI Coordinates  | Area                                           | Side                      |   |
|--------------------------------------------------------|------------------------|----------|----------------------|------------------------------------------------|---------------------------|---|
| Negative RSV GLM, intertemporal choice                 | 1649                   | 5.49     | 36 -82 -18           | Lateral Occipital Cortex, inferior division    | R                         |   |
|                                                        | 945                    | 5.72     | 44 -44 44            | Supramarginal Gyrus, posterior division        | R                         |   |
|                                                        | 798                    | 5.07     | -50 -58 -22          | Inferior Temporal Gyrus, temporooccipital part | L                         |   |
|                                                        | 619                    | 5.45     | -50 -40 44           | Supramarginal Gyrus, anterior division         | L                         |   |
|                                                        | 534                    | 4.57     | 8 22 48              | Paracingulate Gyrus                            | R                         |   |
|                                                        | 468                    | 4.92     | 40 58 -6             | Frontal Pole                                   | R                         |   |
|                                                        | 385                    | 4.48     | 42 32 14             | Inferior Frontal Gyrus, pars triangularis      | R                         |   |
|                                                        | 382                    | 5.09     | -44 46 -8            | Frontal Pole                                   | L                         |   |
|                                                        | 222                    | 4.55     | 34 28 -10            | Frontal Orbital Cortex                         | R                         |   |
|                                                        | 208                    | 5.51     | -42 18 -6            | Frontal Orbital Cortex                         | L                         |   |
|                                                        | 159                    | 4.51     | -50 6 22             | Precentral Gyrus                               | L                         |   |
|                                                        | 137                    | 3.90     | 48 12 24             | Inferior Frontal Gyrus, pars opercularis       | R                         |   |
| 118                                                    | 4.52                   | 34 12 48 | Middle Frontal Gyrus | R                                              |                           |   |
| Positive RSV GLM, intertemporal choice                 | 263                    | 4.82     | -58 -40 24           | Parietal Operculum Cortex                      | L                         |   |
|                                                        | 154                    | 4.25     | 0 46 -4              | Paracingulate gyrus                            | N/A                       |   |
| Negative RSV GLM, risk                                 | 9096                   | 6.38     | -6 -90 -8            | Lingual Gyrus                                  | L                         |   |
|                                                        | 2059                   | 5.84     | 14 -70 56            | Lateral Occipital Cortex, superior division    | R                         |   |
|                                                        | 1522                   | 6.74     | -42 6 38             | Middle Frontal Gyrus                           | L                         |   |
|                                                        | 1380                   | 6.36     | 0 14 52              | Paracingulate Gyrus                            | N/A                       |   |
|                                                        | 993                    | 5.96     | 46 8 36              | Precentral Gyrus                               | R                         |   |
|                                                        | 539                    | 5.89     | 34 2 48              | Middle Frontal Gyrus                           | R                         |   |
|                                                        | 442                    | 5.32     | -30 24 -4            | Insular Cortex                                 | L                         |   |
|                                                        | 280                    | 5.35     | 34 24 0              | Insular Cortex                                 | R                         |   |
|                                                        | 132                    | 4.28     | 8 -74 -24            | Occipital Fusiform Gyrus                       | R                         |   |
|                                                        | 121                    | 4.64     | -2 -30 -4            | Brain-Stem                                     | L                         |   |
|                                                        | Positive RSV GLM, risk | 1396     | 5.04                 | 58 -24 22                                      | Parietal Operculum Cortex | R |
|                                                        |                        | 1160     | 5.09                 | -62 -30 18                                     | Parietal Operculum Cortex | L |
| 828                                                    |                        | 4.67     | 0 42 -8              | Paracingulate Gyrus                            | N/A                       |   |
| 485                                                    |                        | 4.78     | 10 -92 20            | Occipital Pole                                 | R                         |   |
| 414                                                    |                        | 4.42     | -52 -62 20           | Middle Temporal Gyrus, temporooccipital part   | L                         |   |
| 371                                                    |                        | 4.52     | 58 -56 4             | Middle Temporal Gyrus, temporooccipital part   | R                         |   |
| 358                                                    |                        | 4.63     | -56 6 0              | Precentral Gyrus                               | L                         |   |
| 338                                                    |                        | 4.26     | 0 2 44               | Cingulate Gyrus, anterior division             | N/A                       |   |
| 333                                                    |                        | 4.51     | -26 0 -24            | Parahippocampal Gyrus, anterior division       | L                         |   |
| 305                                                    |                        | 4.87     | -22 -46 62           | Superior Parietal Lobule                       | L                         |   |
| 295                                                    |                        | 4.48     | 24 -48 58            | Superior Parietal Lobule                       | R                         |   |
| 167                                                    |                        | 4.37     | 48 18 -36            | Temporal Pole                                  | R                         |   |
| 121                                                    |                        | 4.38     | 18 -4 -18            | Right Amygdala                                 | R                         |   |
| Other over Self negative RSV GLM, intertemporal choice | 92                     | 4.35     | 4 34 38              | Paracingulate Gyrus                            | R                         |   |
| Other over Self negative RSV GLM, risk                 | 110                    | 4.12     | 12 -60 26            | Precuneous Cortex                              | R                         |   |
|                                                        | 95                     | 4.01     | 4 -32 46             | Cingulate Gyrus, posterior division            | R                         |   |

**Related to Figure 3.** Whole-brain thresholded at  $P < 0.05$  FWE-corrected, cluster-defining threshold  $P < 0.001$ . Coordinates were reported in accordance with the Montreal Neurological Institute (MNI) Atlas.
