# Supplementary material for: The dorsomedial prefrontal cortex computes task-invariant relative subjective value for self and other
Source: PubMed Central journal article supplement (PMC6565363; doi:10.7554/elife.44939), 2019-06-13
Supplement: elife-44939-fig3-data2.pdf [file elife-44939-fig3-data2.pdf]

**Figure 3—source data 2: GLM analysis of offline subjective value recapitulating the methods of Nicolle et al., Neuron, 2012 in the intertemporal choice task**

| Contrast                                        | Voxels | Max z    | Max MNI Coordinates   | Area                                        | Side |
|-------------------------------------------------|--------|----------|-----------------------|---------------------------------------------|------|
| Offline subjective value, Self and Other trials | 7886   | 10.1     | -4 -92 -16            | Occipital Pole                              | L    |
|                                                 | 7323   | 10.2     | 30 -88 -16            | Occipital Fusiform Gyrus                    | R    |
|                                                 | 1147   | 7.44     | 44 36 10              | Frontal Pole                                | R    |
|                                                 | 867    | 5.84     | 10 10 52              | Paracingulate Gyrus                         | R    |
|                                                 | 622    | 5.97     | -46 10 26             | Inferior Frontal Gyrus                      | L    |
|                                                 | 556    | 4.96     | 2 -34 -4              | Brain-Stem                                  | R    |
|                                                 | 398    | 6.16     | 30 20 0               | Insular Cortex                              | R    |
|                                                 | 385    | 6.15     | -36 20 0              | Insular Cortex                              | L    |
|                                                 | 125    | 5.60     | 24 -34 -46            | Brain-Stem                                  | R    |
|                                                 | 111    | 4.86     | 28 -2 42              | Precentral Gyrus                            | R    |
| Offline subjective value, Self trials only      | 15172  | 8.19     | -10 -94 -20           | Occipital Pole                              | L    |
|                                                 | 1335   | 5.11     | 46 26 14              | Inferior Frontal Gyrus                      | R    |
|                                                 | 1034   | 5.47     | 4 16 40               | Paracingulate Gyrus                         | R    |
|                                                 | 737    | 5.16     | -48 22 26             | Middle Frontal Gyrus                        | L    |
|                                                 | 285    | 4.49     | 20 -30 -4             | Cingulate Gyrus, posterior division         | R    |
|                                                 | 244    | 5.09     | -30 22 48             | Middle Frontal Gyrus                        | L    |
|                                                 | 243    | 5.05     | 38 22 4               | Frontal Operculum Cortex                    | R    |
|                                                 | 212    | 5.76     | 34 -2 46              | Middle Frontal Gyrus                        | R    |
|                                                 | 136    | 5.03     | 22 -38 -46            | Cerebellum                                  | R    |
|                                                 | 83     | 4.30     | -26 -38 -48           | Cerebellum                                  | L    |
| Offline subjective value, Other trials only     | 4056   | 7.24     | -36 -80 -22           | Lateral Occipital Cortex, inferior division | L    |
|                                                 | 3656   | 7.65     | 40 -82 -20            | Lateral Occipital Cortex, inferior division | R    |
|                                                 | 605    | 5.72     | 50 32 24              | Middle Frontal Gyrus                        | R    |
|                                                 | 330    | 6.08     | 2 12 46               | Paracingulate Gyrus                         | R    |
|                                                 | 311    | 5.04     | -38 18 -6             | Insular Cortex                              | L    |
|                                                 | 279    | 6.23     | 36 20 0               | Insular Cortex                              | R    |
|                                                 | 130    | 4.60     | -18 -30 -6            | Parahippocampal Gyrus, posterior division   | L    |
|                                                 | 130    | 4.95     | -44 -44 40            | Supramarginal Gyrus, posterior division     | L    |
|                                                 | 116    | 4.71     | -40 -22 42            | Postcentral Gyrus                           | L    |
|                                                 | 111    | 5.38     | -52 8 30              | Precentral Gyrus                            | L    |
|                                                 | 104    | 5.17     | 52 -38 48             | Supramarginal Gyrus, posterior division     | R    |
| 100                                             | 5.42   | 18 -68 6 | Intracalcarine Cortex | R                                           |      |

**Related to Figure 3.** Whole-brain thresholded at  $P < 0.05$  FWE-corrected, cluster-defining threshold  $P < 0.001$ . Coordinates were reported in accordance with the Montreal Neurological Institute (MNI) Atlas.
