# Supplementary material for: The dorsomedial prefrontal cortex computes task-invariant relative subjective value for self and other
Source: PubMed Central journal article supplement (PMC6565363; doi:10.7554/elife.44939), 2019-06-13
Supplement: elife-44939-fig4-data1.pdf [file elife-44939-fig4-data1.pdf]

**Supplementary Table 4: ROIs generated for multivariate analyses**

| <b>ROI</b>        | <b>Voxels</b> | <b>COG MNI Coordinates</b> | <b>Side</b> |
|-------------------|---------------|----------------------------|-------------|
| dmPFC, big        | 257           | 0 22 38                    | N/A         |
| dmPFC, small      | 81            | 0 22 38                    | N/A         |
| imPFC             | 257           | 0 42 20                    | N/A         |
| vmPFC, big        | 257           | 0 40 -4                    | N/A         |
| vmPFC, small      | 81            | 0 40 -4                    | N/A         |
| S1                | 257           | 48 48 -20                  | R           |
| dmPFC, anatomical | 1539          | 12.6 30.6 40.4             | R           |
|                   | 1387          | -13.0 30.6 41.0            | L           |

**Related to Figure 4.** Dorsomedial prefrontal cortex (dmPFC), ventromedial prefrontal cortex (vmPFC), and an intermediate area (imPFC) spherical ROIs were grown to 8 mm based on peak voxels from previous studies for MVPA. Please note that small dmPFC and vmPFC spherical ROIs grown to 5 mm were used to extract GLM effect sizes. Anatomical ROIs for dmPFC and vmPFC were also taken from previous studies. COG stands for center of gravity. Coordinates were reported in accordance with the Montreal Neurological Institute (MNI) Atlas.
