# Supplementary material for: The dorsomedial prefrontal cortex computes task-invariant relative subjective value for self and other
Source: PubMed Central journal article supplement (PMC6565363; doi:10.7554/elife.44939), 2019-06-13
Supplement: elife-44939-fig4-data2.pdf [file elife-44939-fig4-data2.pdf]

**Figure 4—source data 2: MVPA significance for online relative subjective value analyses**

| <b>Analysis</b>     | <b>ROI</b> | <b>Participant Mean</b> | <b>Null Mean</b> | <b><i>P</i></b> |
|---------------------|------------|-------------------------|------------------|-----------------|
| Intertemporal Self  | S1         | 0.5177                  | 0.5001           | 0.1906          |
|                     | vmPFC      | 0.5228                  | 0.5007           | 0.1385          |
|                     | imPFC      | 0.5219                  | 0.4996           | 0.1380          |
|                     | dmPFC      | 0.5581                  | 0.5000           | 0.0035          |
| Intertemporal Other | S1         | 0.4956                  | 0.4997           | 0.5753          |
|                     | vmPFC      | 0.5181                  | 0.4980           | 0.1649          |
|                     | imPFC      | 0.5300                  | 0.5003           | 0.0770          |
|                     | dmPFC      | 0.5474                  | 0.4994           | 0.0087          |
| Risk Self           | S1         | 0.5091                  | 0.5001           | 0.3271          |
|                     | vmPFC      | 0.5040                  | 0.5010           | 0.4414          |
|                     | imPFC      | 0.5357                  | 0.4985           | 0.0307          |
|                     | dmPFC      | 0.5472                  | 0.4989           | 0.0070          |
| Risk Other          | S1         | 0.5067                  | 0.4993           | 0.3395          |
|                     | vmPFC      | 0.4905                  | 0.4987           | 0.6542          |
|                     | imPFC      | 0.5254                  | 0.4993           | 0.0873          |
|                     | dmPFC      | 0.5730                  | 0.4984           | 0.0001          |

**Related to Figure 4.** Analysis types include Self and Other trials from the intertemporal or risky choice tasks. 8-mm spherical regions of interest (ROIs) include primary somatosensory cortex (S1), ventromedial prefrontal cortex (vmPFC), dorsomedial prefrontal cortex (dmPFC), and an intermediate ROI placed in the medial prefrontal cortex between the vmPFC and dmPFC (imPFC).
