# Supplementary material for: The dorsomedial prefrontal cortex computes task-invariant relative subjective value for self and other
Source: PubMed Central journal article supplement (PMC6565363; doi:10.7554/elife.44939), 2019-06-13
Supplement: elife-44939-fig5-data1.pdf [file elife-44939-fig5-data1.pdf]

**Figure 5—source data 1: MVPA significance for online relative subjective value analyses across agents and tasks**

| <b>Analysis</b>                            | <b>Participant Mean</b> | <b>Null Mean</b> | <b><i>P</i></b> |
|--------------------------------------------|-------------------------|------------------|-----------------|
| Intertemporal, train self test other       | 0.5590                  | 0.4998           | 0.0021          |
| Intertemporal, train other test self       | 0.5578                  | 0.5010           | 0.0033          |
| Risk, train self test other                | 0.5464                  | 0.5006           | 0.0087          |
| Risk, train other test self                | 0.5421                  | 0.4982           | 0.0148          |
| Train intertemporal self, test risk self   | 0.5633                  | 0.5007           | 0.0196          |
| Train intertemporal self, test risk other  | 0.5475                  | 0.5003           | 0.0549          |
| Train intertemporal other, test risk other | 0.5558                  | 0.5028           | 0.0450          |
| Train intertemporal other, test risk self  | 0.5852                  | 0.4988           | 0.0025          |
| Train risk self, test intertemporal self   | 0.5688                  | 0.5038           | 0.0207          |
| Train risk self, test intertemporal other  | 0.5647                  | 0.5009           | 0.0176          |
| Train risk other, test intertemporal other | 0.5577                  | 0.4995           | 0.0316          |
| Train risk other, test intertemporal self  | 0.5628                  | 0.4997           | 0.0282          |

**Related to Figure 5.** Analysis types include training on Self and testing on Other trials, and vice versa, with the intertemporal and risky choice tasks. Also included are analyses training pattern classifiers on either intertemporal Self or Other trials and testing them on risk Self or Other trials, and vice versa. All pattern classifiers in this table were trained on data from the dorsomedial prefrontal cortex (dmPFC) 8-mm spherical region of interest.
